# Supplementary material
Source: PubMed Central journal article supplement (PMC5233558)
Supplement: NIHMS824858-supplement-01.pdf [file NIHMS824858-supplement-01.pdf]

RUNNING HEAD: SENSITIVITY TO COST OF LOW-NICOTINE CIGARETTES

**Supplementary Tables:**

Supplementary Table 1. Median demand parameters for Study Cigarettes.

|                            |            | <b>Usual Brand</b> | <b>15.8</b> | <b>5.2</b> | <b>2.4</b> | <b>1.3</b> | <b>0.4</b> | <b>0.4 (HT)</b> |
|----------------------------|------------|--------------------|-------------|------------|------------|------------|------------|-----------------|
| <b>Intensity</b>           | Baseline   | 20                 | 20          | 20         | 17         | 20         | 20         | 20              |
|                            | Week 6     | 20                 | 20          | 20         | 10         | 15         | 11.5       | 15              |
|                            | Abstinence | 20                 | 20          | 17.5       | 10         | 10         | 10.5       | 10              |
| <b>Omax</b>                | Baseline   | 6.2                | 6.5         | 8          | 6          | 7.5        | 7.5        | 8               |
|                            | Week 6     | 8                  | 6           | 6          | 4          | 4          | 3          | 4               |
|                            | Abstinence | 6                  | 7           | 5.55       | 2.45       | 3          | 2.7        | 2.85            |
| <b>Pmax</b>                | Baseline   | 0.5                | 0.5         | 0.55       | 0.5        | 0.5        | 0.5        | 0.7             |
|                            | Week 6     | 0.4                | 0.4         | 0.4        | 0.3        | 0.3        | 0.3        | 0.3             |
|                            | Abstinence | 0.4                | 0.4         | 0.3        | 0.3        | 0.3        | 0.3        | 0.3             |
| <b>Break point</b>         | Baseline   | 0.9                | 1           | 1.5        | 0.9        | 2          | 0.5        | 2               |
|                            | Week 6     | 0.7                | 0.8         | 0.6        | 0.45       | 0.55       | 1          | 0.5             |
|                            | Abstinence | 0.7                | 0.7         | 0.55       | 0.45       | 0.5        | 0.5        | 0.4             |
| <b><math>\alpha</math></b> | Baseline   | 0.043              | 0.043       | 0.038      | 0.047      | 0.043      | 0.043      | 0.039           |
|                            | Week 6     | 0.039              | 0.039       | 0.05       | 0.058      | 0.063      | 0.081      | 0.062           |
|                            | Abstinence | 0.036              | 0.031       | 0.046      | 0.054      | 0.065      | 0.085      | 0.066           |

RUNNING HEAD: SENSITIVITY TO COST OF LOW-NICOTINE CIGARETTES

Supplementary Table 2. Median demand parameters for Usual Brand Cigarettes.

|                            |            | <b>Usual<br/>Brand</b> | <b>15.8</b> | <b>5.2</b> | <b>2.4</b> | <b>1.3</b> | <b>0.4</b> | <b>0.4<br/>(HT)</b> |
|----------------------------|------------|------------------------|-------------|------------|------------|------------|------------|---------------------|
| <b>Inten<br/>sity</b>      | Baseline   | 20                     | 20          | 20         | 17         | 20         | 20         | 20                  |
|                            | Week 6     | 20                     | 20          | 20         | 18         | 20         | 15.5       | 20                  |
|                            | Abstinence | 20                     | 20          | 20         | 15         | 15         | 15         | 16.5                |
| <b>Omax</b>                | Baseline   | 6.2                    | 6.5         | 8          | 6          | 7.5        | 7.5        | 8                   |
|                            | Week 6     | 8                      | 6.8         | 7.35       | 7          | 6          | 6          | 6                   |
|                            | Abstinence | 6                      | 7.5         | 6          | 6          | 4.65       | 6          | 4.75                |
| <b>Pmax</b>                | Baseline   | 0.5                    | 0.5         | 0.55       | 0.5        | 0.5        | 0.5        | 0.7                 |
|                            | Week 6     | 0.4                    | 0.4         | 0.5        | 0.5        | 0.4        | 0.45       | 0.4                 |
|                            | Abstinence | 0.4                    | 0.4         | 0.4        | 0.4        | 0.4        | 0.4        | 0.4                 |
| <b>Break<br/>point</b>     | Baseline   | 0.9                    | 1           | 1.5        | 0.9        | 2          | 1          | 2                   |
|                            | Week 6     | 0.7                    | 0.8         | 0.8        | 0.8        | 0.8        | 0.9        | 0.9                 |
|                            | Abstinence | 0.7                    | 0.8         | 0.7        | 0.8        | 0.7        | 0.8        | 0.7                 |
| <b><math>\alpha</math></b> | Baseline   | 0.043                  | 0.043       | 0.038      | 0.047      | 0.043      | 0.043      | 0.039               |
|                            | Week 6     | 0.039                  | 0.041       | 0.036      | 0.035      | 0.045      | 0.042      | 0.042               |
|                            | Abstinence | 0.036                  | 0.032       | 0.041      | 0.04       | 0.048      | 0.048      | 0.047               |
